# Supplementary material for: Interplay between ferroelectricity and metallicity in BaTiO3
Source: Royal Society of Chemistry journal article supplement (doi:10.1039/d1tc01868j), 2021-01-01
Supplement: d1tc01868j1.pdf [file d1tc01868j1.pdf]

# Interplay between Ferroelectricity and Metallicity in BaTiO<sub>3</sub>

Veronica F. Michel, Tobias Esswein,\* and Nicola A. Spaldin

*Materials Theory, Department of Materials, ETH Zürich, Wolfgang-Pauli-Strasse 27, 8093 Zürich, Switzerland*

\*Corresponding author: *tobias.esswein@mat.ethz.ch*

## Electronic Supplementary Information

If not otherwise specified in the caption of the figures, the computational parameters used correspond to the ones described in the methods section of the main text.

### 1 Undoped Tetragonal BaTiO<sub>3</sub>

#### Berry-phase Calculation

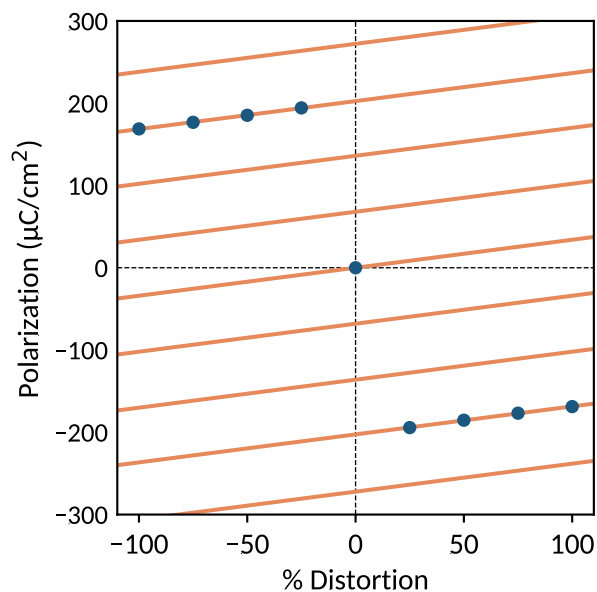

Figure 1: Berry-phase calculation for tetragonal BaTiO<sub>3</sub>. The calculated spontaneous polarization of the system is 34 μC/cm<sup>2</sup>.

## 2 Background-charge Doped Pseudocubic BaTiO<sub>3</sub> Unit Cell

### Density of States

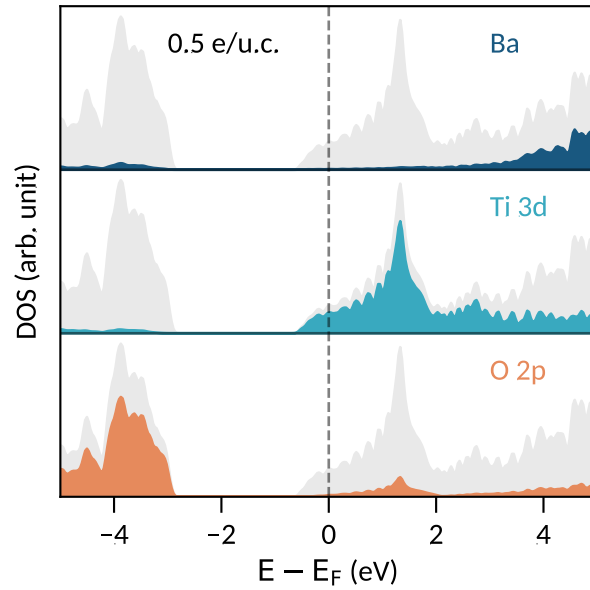

Figure 2: Density of states for pseudocubic BaTiO<sub>3</sub> doped with 0.5 e/u.c.

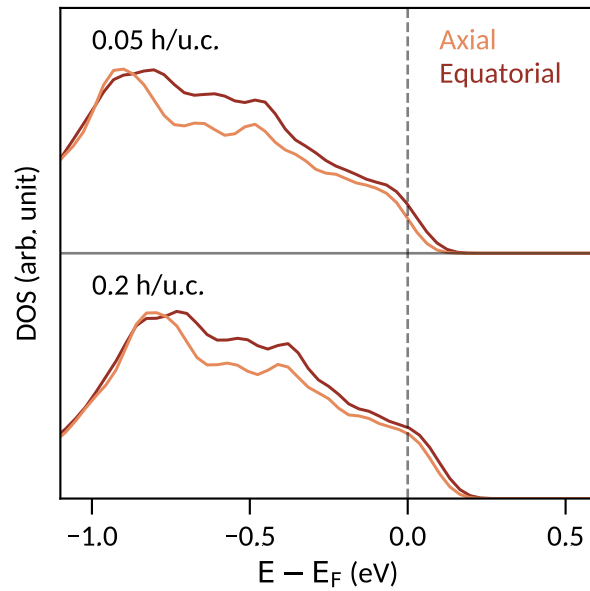

Figure 3: Oxygen site-resolved densities of states for pseudocubic BaTiO<sub>3</sub> doped with 0.05 h/u.c. (top) and 0.2 h/u.c. (bottom).

### 3 Impurity-doped BaTiO<sub>3</sub> Supercells

#### Polarization, Volume and Tetragonality

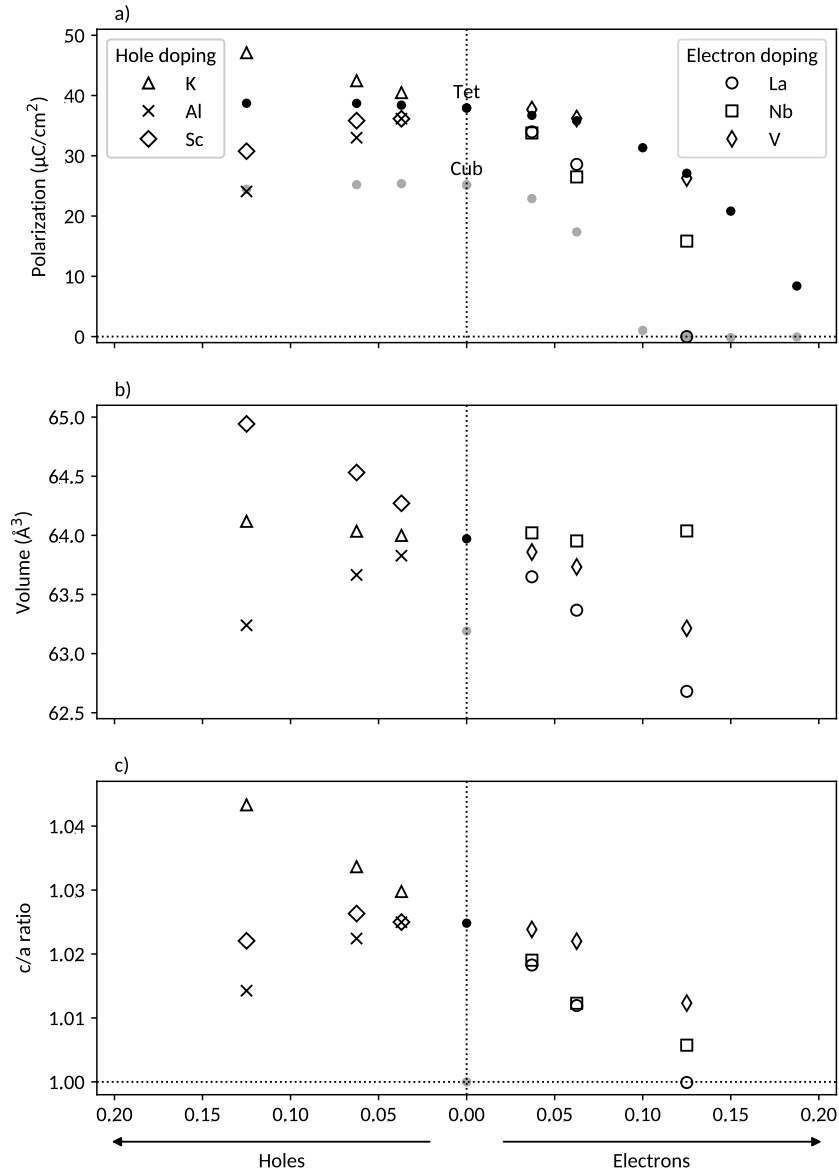

Figure 4: Polarization (a), average volume (b) and  $c/a$  ratio (c) of doped BaTiO<sub>3</sub> as a function of the charge-carrier concentration (electrons on the right, holes on the left). The charge carriers are introduced through doping with impurity atoms in  $2 \times 2 \times 2$ ,  $2\sqrt{2} \times 2\sqrt{2} \times 2$  and  $3 \times 3 \times 3$  supercells and their charge-carrier concentrations are 0.125, and 0.0625 and 0.037 carriers/u.c., respectively. The k-point grids used for these calculations are  $12 \times 12 \times 12$ ,  $6 \times 6 \times 6$  and  $4 \times 4 \times 4$ , respectively. The systems are labeled with the name of their respective dopant. The black and grey dots correspond to the tetragonal and pseudocubic background-charge references.

## Bond Ratios

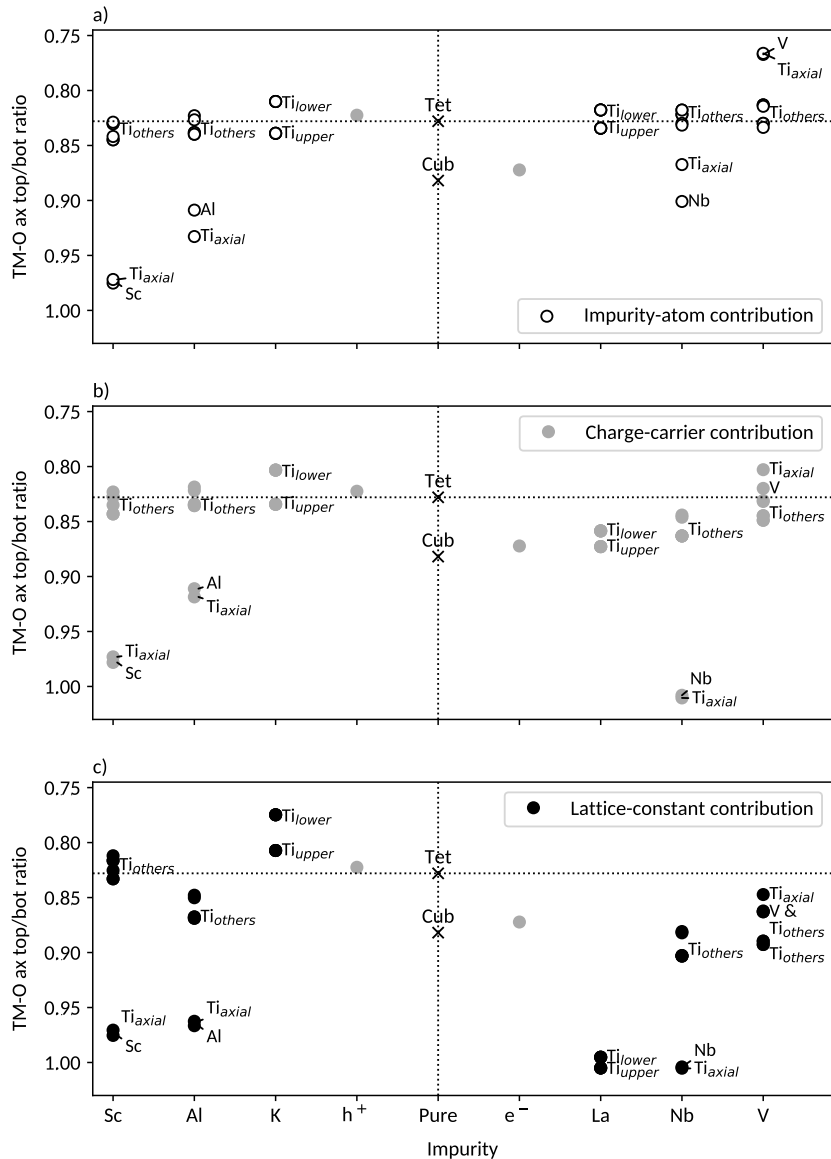

Figure 5: Bond ratios of the transition metal - oxygen axial top to bottom bonds for tetragonal BaTiO<sub>3</sub>. a) Impurity-atom contribution with the impurity atom, 0 carriers/u.c. and fixed lattice constants (white circles), b) Charge-carrier contribution with the impurity atom, 0.125 carriers/u.c. and fixed lattice constants (grey circles) and c) Lattice-constant contribution with the impurity atom, 0.125 carriers/u.c. and free lattice constants (black circles). The impurity atom is indicated on the x-axis. Each system corresponds to a 2×2×2 supercell and therefore has eight bond ratio values (for its eight transition metals), partly overlapping. Pure BaTiO<sub>3</sub> in tetragonal and pseudocubic symmetry (abbreviated *tet* and *cub*) as well as background-charge doped tetragonal systems (holes: h<sup>+</sup>, electrons: e<sup>-</sup>) are given as a reference.

## Density of States

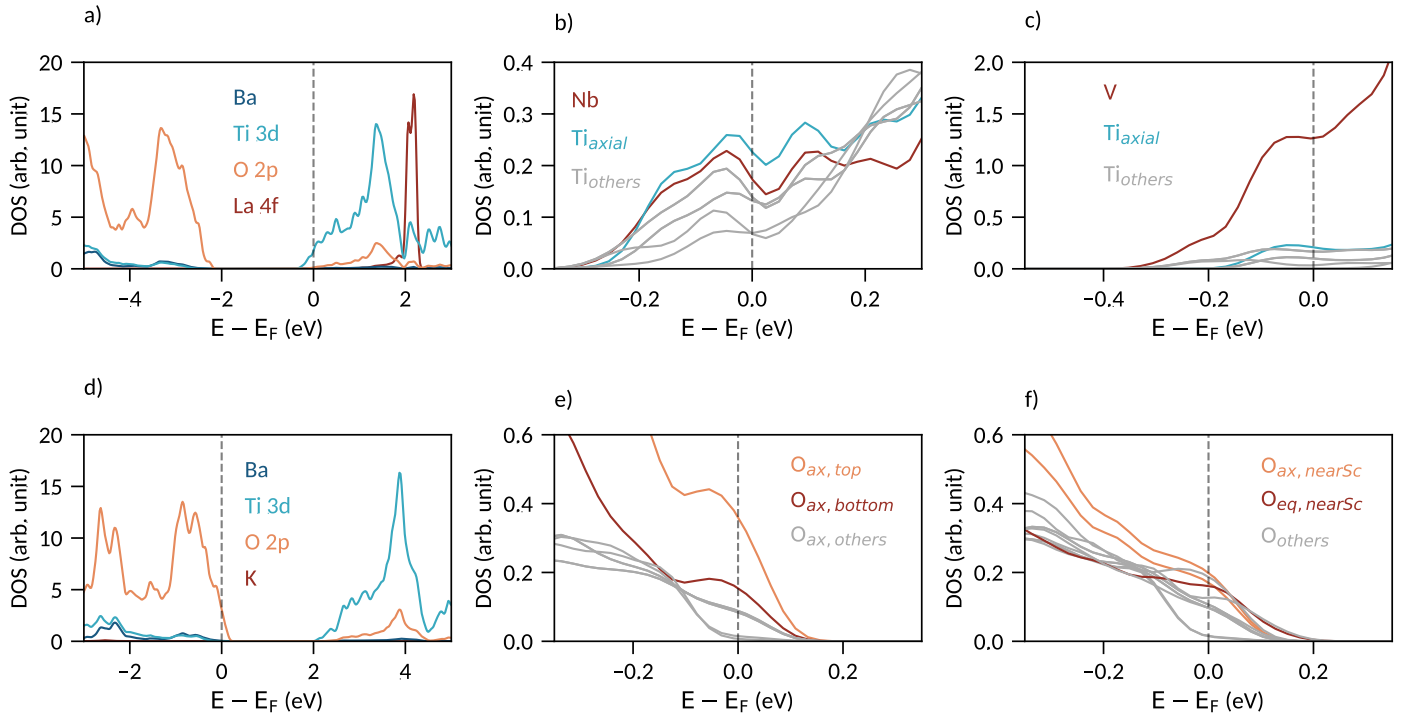

Figure 6: a) Density of states for La-doped  $\text{BaTiO}_3$  (with one La in a  $2 \times 2 \times 2$   $\text{BaTiO}_3$  supercell with fixed lattice constants). As the La introduces one valence electron into the system, the Fermi energy lies in the conduction band. The La f-states lie at higher energies and the main contribution to the conduction band comes from the Ti d orbitals. b) Transition-metal site-resolved density of states of Nb-doped  $\text{BaTiO}_3$  (BTNO with one Nb in a  $2 \times 2 \times 2$   $\text{BaTiO}_3$  supercell and fixed lattice constants). The region around the Fermi energy in the conduction band is shown. Two sites, the Nb and its axial neighboring Ti along the polar axis, have particularly large contributions. c) Transition-metal site-resolved density of states for V-doped  $\text{BaTiO}_3$  (with one V in a  $2 \times 2 \times 2$   $\text{BaTiO}_3$  supercell with fixed lattice constants). The conduction band region around the Fermi energy is shown. The V has a particularly large contribution, whereas the its axial neighboring Ti along the polar axis hardly contributes to the conduction band. d) Density of states for K-doped  $\text{BaTiO}_3$  (BKTO with one K in a  $2 \times 2 \times 2$   $\text{BaTiO}_3$  supercell and fixed lattice constants). One valence electron is depleted from the system so that the Fermi energy lies in the valence band. The K does not affect the DOS around the Fermi energy. e) Axial oxygen site-resolved density of states of Al-doped  $\text{BaTiO}_3$  (with one Al in a  $2 \times 2 \times 2$   $\text{BaTiO}_3$  supercell with fixed lattice constants). The most contributing sites are the axial oxygens around the Al atom (top and bottom). f) Oxygen site-resolved density of states of Sc-doped  $\text{BaTiO}_3$  (BTSO with one Sc in a  $2 \times 2 \times 2$   $\text{BaTiO}_3$  supercell and fixed lattice constants). The most contributing sites are the axial and equatorial oxygens around the Sc atom. All the supercells have tetragonal symmetry. All DOS are computed with a  $12 \times 12 \times 12$  k-point grid.
